# Supplementary material
Source: publisher site journal article supplement (http://e-cmh.org/upload/media/cmh-2023-0328-Supplementary-Fig-1.pdf)
Supplement: Supplementary file 1 [file cmh-2023-0328-Supplementary-Fig-1.pdf]

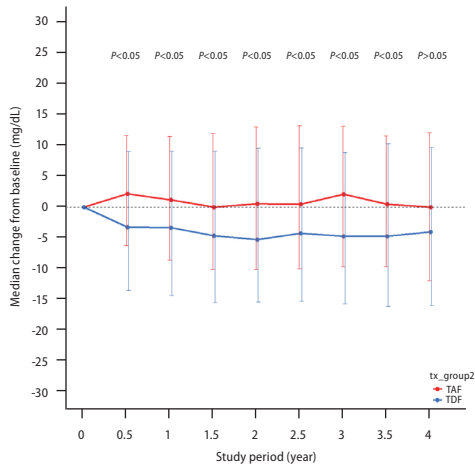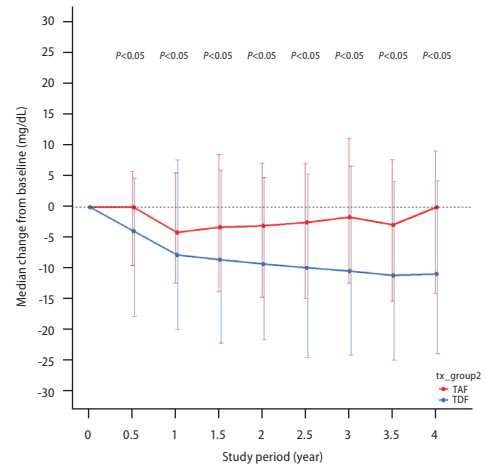

**A** Total cholesterol

**B** High-density lipoprotein

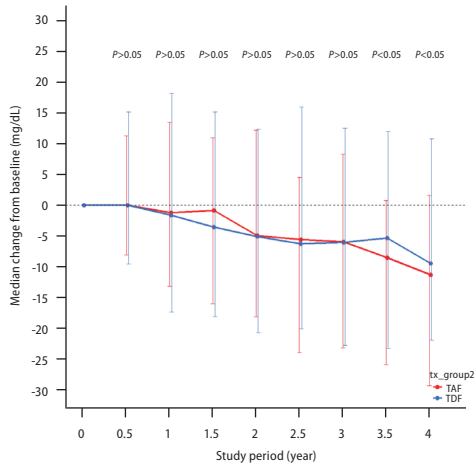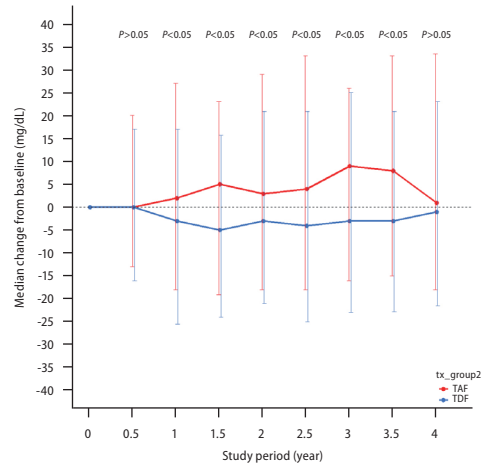

**C** Low-density lipoprotein

**D** Triglyceride

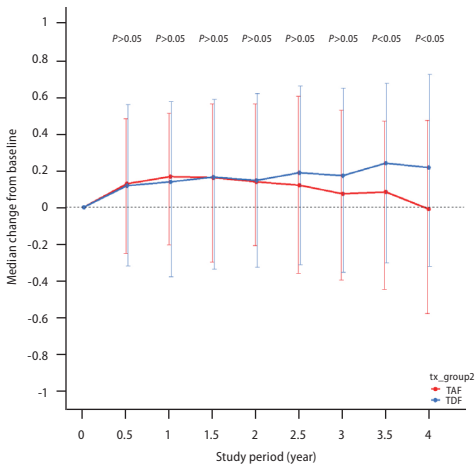

**E** Total cholesterol/high-density lipoprotein ratio

**Supplementary Figure 1.** Serial changes in the lipid profiles of the entire study population.
